# Supplementary material for: Rapid Expansion of Phenylthiocarbamide Non-Tasters among Japanese Macaques
Source: PubMed Central journal article supplement (PMC4511751; doi:10.1371/journal.pone.0132016), 2015-07-22
Supplement: pone.0132016.s001.pdf [file pone.0132016.s001.pdf]

## Vector Construct

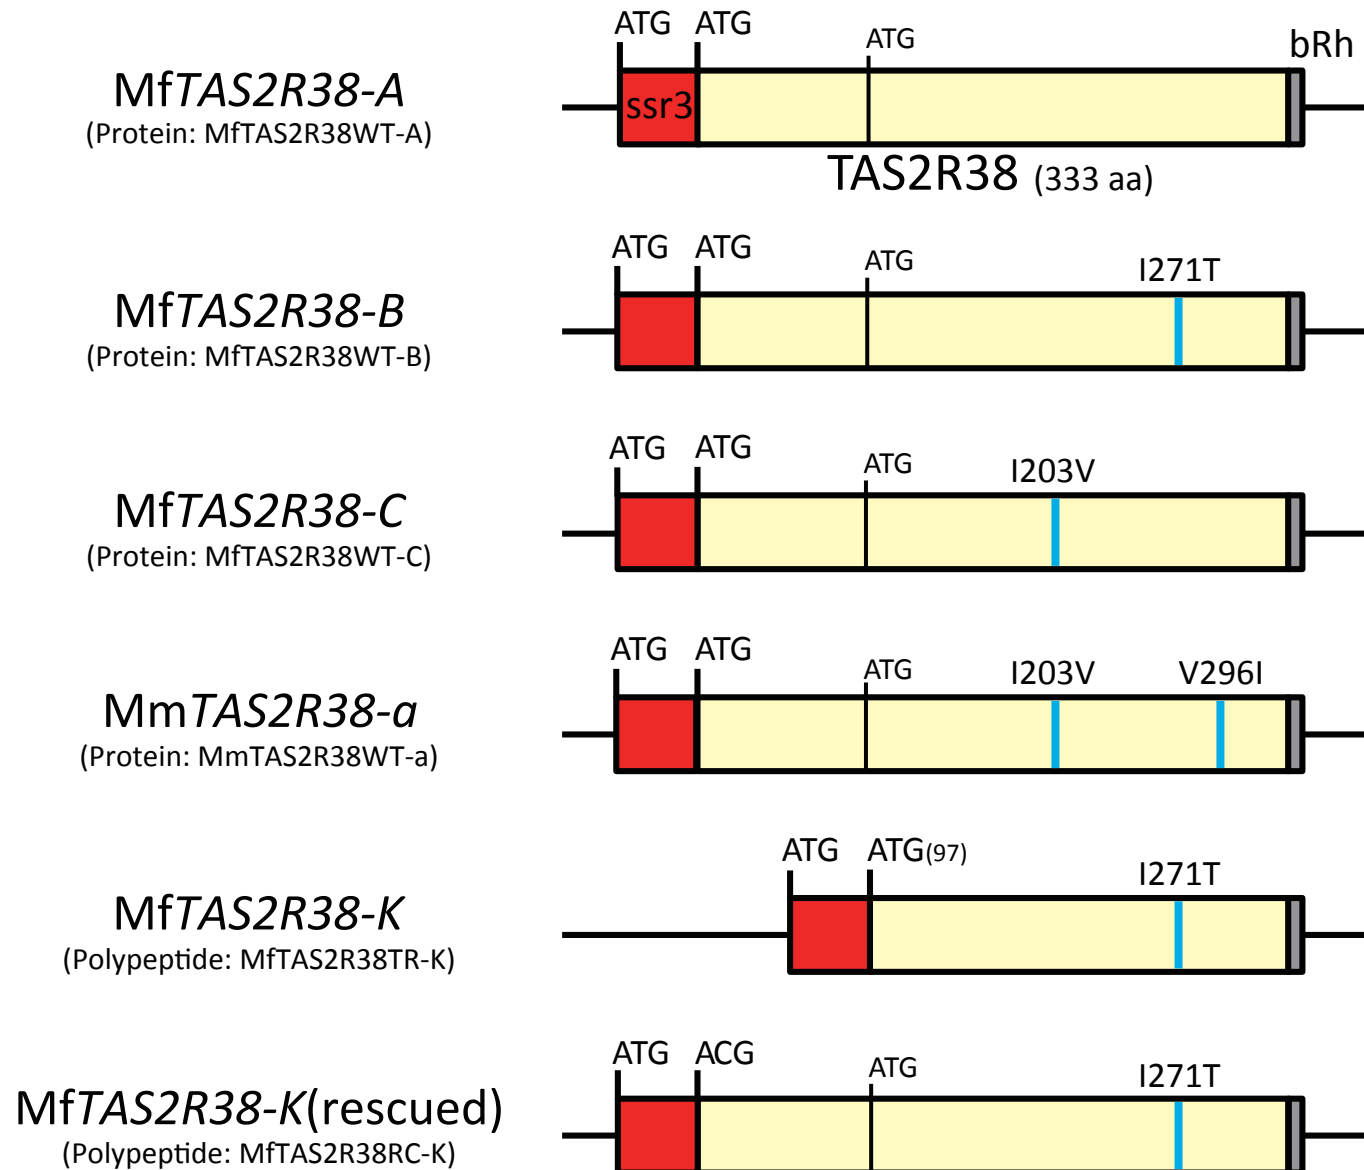

**S1 Fig. Schematic of vector constructs used to analyze receptor activity.** Red and gray squares indicate somatostatin (ssr3) and rhodopsin (bRh) tags, respectively. Blue lines indicate differences in amino acids compared with MfTAS2R38-A.
