# Supplementary material for: Rapid Expansion of Phenylthiocarbamide Non-Tasters among Japanese Macaques
Source: PubMed Central journal article supplement (PMC4511751; doi:10.1371/journal.pone.0132016), 2015-07-22
Supplement: pone.0132016.s004.pdf [file pone.0132016.s004.pdf]

**S1 Table. Variable sites in 20 Japanese and 10 rhesus macaque *TAS2R38* alleles and their frequencies.**

| Nucleotide Change            |             | T2C | T9G | C10G | G19A | G164T,C | G191A | C243T | T349C | G368A | G607A | G704A | C736T | T812C | G886A | C930G | A959C | C969T | C972T | C992T | N   | Freq.(%) |       |
|------------------------------|-------------|-----|-----|------|------|---------|-------|-------|-------|-------|-------|-------|-------|-------|-------|-------|-------|-------|-------|-------|-----|----------|-------|
| Amino Acid Change            |             | M1T | T3T | L4V  | V7I  | C55F,S  | R64Q  | F81F  | Y117H | R123H | V203I | R235H | L246F | I271T | V296I | T310T | K320T | A323A | D324D | T331I |     |          |       |
| Japanese macaques            | Paha        | T   | T   | C    | A    | G       | G     | C     | T     | A     | G     | G     | C     | T     | G     | C     | A     | C     | C     | C     | 519 | 43.47    |       |
|                              | <i>Mf-A</i> | T   | T   | C    | G    | G       | G     | C     | T     | G     | A     | G     | C     | T     | G     | C     | A     | C     | C     | C     | 519 | 43.47    |       |
|                              | <i>Mf-B</i> | .   | .   | .    | .    | .       | .     | .     | .     | .     | .     | .     | .     | C     | .     | .     | .     | .     | .     | .     | .   | 373      | 31.24 |
|                              | <i>Mf-C</i> | .   | .   | .    | .    | .       | .     | .     | .     | .     | G     | .     | .     | .     | A     | .     | .     | .     | .     | .     | .   | 77       | 6.45  |
|                              | <i>Mf-D</i> | .   | .   | G    | .    | .       | .     | .     | .     | .     | .     | .     | .     | .     | .     | .     | .     | .     | .     | .     | .   | 19       | 1.59  |
|                              | <i>Mf-E</i> | .   | .   | G    | .    | .       | .     | .     | .     | .     | G     | .     | .     | .     | .     | A     | .     | .     | .     | .     | .   | 25       | 2.09  |
|                              | <i>Mf-F</i> | .   | .   | G    | A    | .       | .     | .     | .     | .     | G     | .     | .     | .     | .     | A     | .     | .     | .     | .     | .   | 29       | 2.43  |
|                              | <i>Mf-G</i> | .   | .   | .    | .    | .       | .     | .     | T     | .     | G     | .     | .     | .     | .     | A     | .     | .     | .     | .     | .   | 10       | 0.84  |
|                              | <i>Mf-H</i> | .   | .   | G    | .    | .       | .     | .     | .     | C     | .     | G     | A     | .     | .     | A     | .     | .     | .     | .     | .   | 15       | 1.26  |
|                              | <i>Mf-I</i> | .   | .   | .    | .    | .       | .     | .     | .     | .     | .     | .     | .     | .     | .     | .     | .     | .     | .     | T     | .   | 21       | 1.76  |
|                              | <i>Mf-J</i> | .   | .   | .    | .    | .       | .     | .     | .     | .     | A     | .     | .     | .     | .     | .     | .     | .     | .     | .     | .   | 8        | 0.67  |
|                              | <i>Mf-K</i> | C   | .   | .    | .    | .       | .     | .     | .     | .     | .     | .     | .     | .     | C     | .     | .     | .     | .     | .     | .   | 23       | 1.93  |
|                              | <i>Mf-L</i> | .   | .   | G    | A    | .       | .     | .     | .     | .     | .     | .     | .     | .     | .     | .     | .     | .     | .     | .     | .   | 17       | 1.42  |
|                              | <i>Mf-M</i> | .   | .   | .    | .    | T       | .     | .     | .     | .     | .     | .     | .     | .     | .     | .     | .     | .     | .     | .     | .   | 10       | 0.84  |
|                              | <i>Mf-N</i> | .   | G   | .    | .    | .       | .     | .     | .     | .     | .     | .     | .     | .     | .     | C     | .     | .     | .     | .     | .   | 4        | 0.34  |
|                              | <i>Mf-O</i> | .   | .   | .    | .    | .       | .     | .     | .     | .     | .     | .     | .     | .     | C     | .     | .     | C     | .     | .     | .   | 33       | 2.76  |
|                              | <i>Mf-P</i> | .   | .   | G    | A    | .       | .     | .     | .     | .     | .     | .     | .     | .     | C     | .     | .     | .     | .     | .     | .   | 2        | 0.17  |
|                              | <i>Mf-Q</i> | .   | .   | .    | .    | .       | A     | .     | .     | .     | .     | .     | .     | .     | .     | .     | .     | .     | .     | .     | .   | 3        | 0.25  |
|                              | <i>Mf-R</i> | .   | G   | .    | .    | .       | .     | .     | .     | .     | .     | G     | .     | .     | .     | A     | .     | .     | .     | .     | .   | 4        | 0.34  |
| <i>Mf-S</i>                  | .           | .   | .   | A    | .    | .       | .     | .     | .     | .     | G     | .     | .     | .     | A     | .     | .     | .     | .     | .     | 1   | 0.08     |       |
| <i>Mf-T</i>                  | .           | .   | G   | .    | .    | .       | .     | .     | C     | .     | G     | .     | .     | .     | A     | .     | .     | .     | .     | .     | 1   | 0.08     |       |
| rhesus macaques <sup>a</sup> | <i>Mm-a</i> | .   | .   | .    | .    | .       | .     | .     | .     | .     | G     | .     | .     | .     | .     | .     | .     | .     | .     | .     | 13  | 12.04    |       |
|                              | <i>Mm-b</i> | .   | .   | .    | .    | .       | .     | .     | .     | .     | G     | .     | .     | .     | .     | .     | .     | .     | T     | T     | 39  | 36.11    |       |
|                              | <i>Mm-d</i> | .   | .   | .    | A    | .       | .     | .     | .     | .     | G     | .     | .     | .     | .     | .     | .     | .     | .     | .     | 11  | 10.19    |       |
|                              | <i>Mm-f</i> | .   | .   | .    | .    | .       | .     | .     | .     | .     | G     | .     | T     | .     | .     | .     | .     | .     | T     | T     | 4   | 3.70     |       |
|                              | <i>Mm-g</i> | .   | .   | .    | A    | C       | .     | .     | .     | .     | G     | .     | .     | .     | .     | .     | .     | .     | .     | .     | 9   | 8.33     |       |
|                              | <i>Mm-i</i> | .   | .   | .    | A    | .       | .     | .     | .     | .     | .     | .     | .     | .     | .     | .     | .     | .     | .     | T     | T   | 18       | 16.67 |
|                              | <i>Mm-j</i> | .   | .   | .    | A    | C       | .     | .     | .     | .     | G     | .     | .     | .     | .     | G     | .     | .     | .     | .     | 6   | 5.56     |       |
|                              | <i>Mm-k</i> | .   | .   | .    | A    | .       | .     | .     | .     | .     | G     | .     | .     | .     | .     | G     | .     | .     | .     | .     | 4   | 3.70     |       |
|                              | <i>Mm-l</i> | .   | .   | .    | .    | .       | .     | .     | .     | .     | G     | .     | .     | .     | .     | G     | .     | .     | .     | .     | 3   | 2.78     |       |
|                              | <i>Mm-m</i> | .   | .   | .    | .    | .       | .     | .     | .     | .     | G     | .     | .     | .     | .     | G     | .     | .     | .     | .     | 1   | 0.93     |       |

<sup>a</sup>Three rhesus macaque alleles, *Mm-c*, *-e*, and *-h*, defined in our previous study (Suzuki et al. 2010) were excluded, as the haplotype phase was inferred by other methods.
