# Supplementary material for: Rapid Expansion of Phenylthiocarbamide Non-Tasters among Japanese Macaques
Source: PubMed Central journal article supplement (PMC4511751; doi:10.1371/journal.pone.0132016), 2015-07-22
Supplement: pone.0132016.s005.pdf [file pone.0132016.s005.pdf]

**S2 Table. The number of *TAS2R38* alleles in 17 populations.**

|             | Allele group <sup>a</sup> | SMK | KKZ | NMT | THM | JGD | HGC | OKZ | MIE | SHG | ARY | MNO | KII | WKS | SHD | KAM | TKO | KOS |      |
|-------------|---------------------------|-----|-----|-----|-----|-----|-----|-----|-----|-----|-----|-----|-----|-----|-----|-----|-----|-----|------|
| <i>Mf-A</i> | (1)                       | 84  | 0   | 3   | 26  | 24  | 15  | 2   | 84  | 31  | 42  | 62  | 32  | 21  | 2   | 3   | 0   | 88  | 519  |
| <i>Mf-B</i> | (1)                       | 49  | 18  | 32  | 10  | 47  | 14  | 4   | 23  | 16  | 13  | 3   | 17  | 25  | 20  | 11  | 50  | 21  | 373  |
| <i>Mf-C</i> | (3)                       | 0   | 0   | 0   | 6   | 1   | 1   | 0   | 14  | 8   | 0   | 3   | 0   | 1   | 0   | 1   | 0   | 42  | 77   |
| <i>Mf-D</i> | (3)                       | 1   | 0   | 0   | 1   | 0   | 0   | 0   | 0   | 5   | 0   | 0   | 0   | 12  | 0   | 0   | 0   | 0   | 19   |
| <i>Mf-E</i> | (3)                       | 0   | 0   | 0   | 7   | 0   | 0   | 0   | 7   | 7   | 3   | 0   | 0   | 0   | 0   | 1   | 0   | 0   | 25   |
| <i>Mf-F</i> | (3)                       | 0   | 0   | 0   | 4   | 0   | 0   | 0   | 6   | 2   | 0   | 0   | 1   | 11  | 0   | 5   | 0   | 0   | 29   |
| <i>Mf-G</i> | (2)                       | 0   | 0   | 0   | 0   | 0   | 0   | 0   | 0   | 0   | 0   | 0   | 0   | 10  | 0   | 0   | 0   | 0   | 10   |
| <i>Mf-H</i> | (3)                       | 0   | 0   | 0   | 0   | 0   | 0   | 0   | 9   | 0   | 0   | 4   | 0   | 2   | 0   | 0   | 0   | 0   | 15   |
| <i>Mf-I</i> | (3)                       | 0   | 0   | 0   | 0   | 8   | 0   | 2   | 0   | 0   | 0   | 0   | 0   | 0   | 0   | 0   | 0   | 11  | 21   |
| <i>Mf-J</i> | (3)                       | 0   | 0   | 0   | 0   | 0   | 0   | 0   | 2   | 0   | 0   | 0   | 6   | 0   | 0   | 0   | 0   | 0   | 8    |
| <i>Mf-K</i> | (2)                       | 0   | 0   | 0   | 0   | 0   | 0   | 0   | 0   | 0   | 0   | 0   | 23  | 0   | 0   | 0   | 0   | 0   | 23   |
| <i>Mf-L</i> | (3)                       | 0   | 0   | 0   | 0   | 0   | 0   | 0   | 8   | 1   | 0   | 0   | 0   | 0   | 0   | 0   | 8   | 0   | 17   |
| <i>Mf-M</i> | (2)                       | 0   | 0   | 0   | 0   | 0   | 0   | 0   | 0   | 0   | 0   | 10  | 0   | 0   | 0   | 0   | 0   | 0   | 10   |
| <i>Mf-N</i> | (2)                       | 0   | 0   | 4   | 0   | 0   | 0   | 0   | 0   | 0   | 0   | 0   | 0   | 0   | 0   | 0   | 0   | 0   | 4    |
| <i>Mf-O</i> | (3)                       | 32  | 0   | 1   | 0   | 0   | 0   | 0   | 0   | 0   | 0   | 0   | 0   | 0   | 0   | 0   | 0   | 0   | 33   |
| <i>Mf-P</i> | (3)                       | 0   | 0   | 0   | 0   | 0   | 0   | 0   | 1   | 0   | 0   | 0   | 0   | 0   | 0   | 1   | 0   | 0   | 2    |
| <i>Mf-Q</i> | (3)                       | 0   | 0   | 0   | 0   | 0   | 0   | 0   | 2   | 0   | 0   | 0   | 1   | 0   | 0   | 0   | 0   | 0   | 3    |
| <i>Mf-R</i> | (2)                       | 0   | 0   | 0   | 0   | 0   | 0   | 0   | 0   | 4   | 0   | 0   | 0   | 0   | 0   | 0   | 0   | 0   | 4    |
| <i>Mf-S</i> | (2)                       | 0   | 0   | 0   | 0   | 0   | 0   | 0   | 0   | 0   | 0   | 0   | 0   | 0   | 0   | 1   | 0   | 0   | 1    |
| <i>Mf-T</i> | (2)                       | 0   | 0   | 0   | 0   | 0   | 0   | 0   | 0   | 0   | 0   | 0   | 0   | 0   | 0   | 1   | 0   | 0   | 1    |
|             |                           | 166 | 18  | 40  | 54  | 80  | 30  | 8   | 156 | 74  | 58  | 82  | 80  | 82  | 22  | 24  | 58  | 162 | 1194 |

<sup>a</sup>Allele groups are: (1) major alleles that observed in many populations, (2) population-specific alleles, and (3) alleles shared by several populations.
