# Supplementary material for: Rapid Expansion of Phenylthiocarbamide Non-Tasters among Japanese Macaques
Source: PubMed Central journal article supplement (PMC4511751; doi:10.1371/journal.pone.0132016), 2015-07-22
Supplement: pone.0132016.s006.pdf [file pone.0132016.s006.pdf]

**S3 Table. Variations in non-coding regions in 8 local populations of Japanese macaques.**

| Locus   | chr          | Length | $S^a$ | $h^b$ | Takahama |       |       |         |            | Jigokudani |       |       |       |         | Hagachi    |       |       |       |       | Mie     |            |       |       |       |       |         |            |       |       |
|---------|--------------|--------|-------|-------|----------|-------|-------|---------|------------|------------|-------|-------|-------|---------|------------|-------|-------|-------|-------|---------|------------|-------|-------|-------|-------|---------|------------|-------|-------|
|         |              |        |       |       | $n^c$    | $S^a$ | $h^b$ | $\pi^d$ | $\theta^e$ | $D^f$      | $n^c$ | $S^a$ | $h^b$ | $\pi^d$ | $\theta^e$ | $D^f$ | $n^c$ | $S^a$ | $h^b$ | $\pi^d$ | $\theta^e$ | $D^f$ | $n^c$ | $S^a$ | $h^b$ | $\pi^d$ | $\theta^e$ | $D^f$ |       |
| 1       | <i>IGS03</i> | 2      | 764   | 5     | 6        | 8     | 0     | 1       | 0.000      | 0.000      | NA    | 8     | 0     | 1       | 0.000      | 0.000 | NA    | 8     | 2     | 3       | 0.059      | 0.079 | -0.65 | 8     | 1     | 2       | 0.031      | 0.039 | -0.45 |
| 2       | <i>IGS05</i> | 3      | 666   | 4     | 5        | 8     | 1     | 2       | 0.035      | 0.045      | -0.45 | 8     | 2     | 3       | 0.079      | 0.091 | -0.33 | 8     | 1     | 2       | 0.019      | 0.045 | -1.16 | 8     | 0     | 1       | 0.000      | 0.000 | NA    |
| 3       | <i>IGS09</i> | 4      | 760   | 7     | 7        | 8     | 1     | 2       | 0.060      | 0.040      | 1.03  | 8     | 4     | 3       | 0.260      | 0.159 | 2.00* | 8     | 5     | 4       | 0.125      | 0.198 | -1.22 | 8     | 5     | 5       | 0.234      | 0.198 | 0.59  |
| 4       | <i>IGS13</i> | 7      | 795   | 12    | 13       | 8     | 2     | 3       | 0.057      | 0.076      | -0.65 | 8     | 3     | 3       | 0.131      | 0.114 | 0.44  | 8     | 4     | 4       | 0.104      | 0.152 | -0.99 | 8     | 3     | 4       | 0.061      | 0.114 | -1.35 |
| 5       | <i>IGS15</i> | 8      | 707   | 5     | 6        | 5     | 0     | 1       | 0.000      | 0.000      | NA    | 5     | 3     | 4       | 0.107      | 0.150 | -1.03 | 8     | 2     | 3       | 0.064      | 0.085 | -0.65 | 5     | 0     | 1       | 0.000      | 0.000 | NA    |
| 6       | <i>IGS19</i> | 10     | 653   | 4     | 5        | 8     | 0     | 1       | 0.000      | 0.000      | NA    | 8     | 2     | 3       | 0.080      | 0.092 | -0.33 | 8     | 2     | 3       | 0.117      | 0.092 | 0.70  | 8     | 1     | 2       | 0.019      | 0.046 | -1.16 |
| 7       | <i>IGS21</i> | 11     | 753   | 2     | 3        | 8     | 1     | 2       | 0.061      | 0.040      | 1.03  | 8     | 0     | 1       | 0.000      | 0.000 | NA    | 8     | 1     | 2       | 0.017      | 0.040 | -1.16 | 8     | 0     | 1       | 0.000      | 0.000 | NA    |
| 8       | <i>IGS25</i> | 16     | 716   | 2     | 3        | 8     | 1     | 2       | 0.017      | 0.042      | -1.16 | 8     | 1     | 2       | 0.064      | 0.042 | 1.03  | 8     | 1     | 2       | 0.064      | 0.042 | 1.03  | 8     | 1     | 2       | 0.017      | 0.042 | -1.16 |
| 9       | <i>IGS27</i> | 20     | 715   | 12    | 9        | 8     | 5     | 3       | 0.298      | 0.211      | 1.37  | 8     | 6     | 4       | 0.221      | 0.253 | -0.43 | 8     | 8     | 5       | 0.338      | 0.337 | 0.01  | 8     | 7     | 5       | 0.372      | 0.295 | 0.92  |
| average |              | 725.4  | 5.9   | 6.3   |          | 1.2   | 1.9   | 0.059   | 0.050      | -          |       | 2.3   | 2.7   | 0.105   | 0.100      | -     |       | 2.9   | 3.1   | 0.101   | 0.119      | -     |       | 2.0   | 2.6   | 0.082   | 0.082      | -     |       |

| Locus   | chr          | Length | $S^a$ | $h^b$ | Shiga |       |       |         |            | Arashiyama |       |       |       |         | Minoo      |       |       |       |       | Kii     |            |       |       |       | average |         |            |       |       |       |         |            |       |
|---------|--------------|--------|-------|-------|-------|-------|-------|---------|------------|------------|-------|-------|-------|---------|------------|-------|-------|-------|-------|---------|------------|-------|-------|-------|---------|---------|------------|-------|-------|-------|---------|------------|-------|
|         |              |        |       |       | $n^c$ | $S^a$ | $h^b$ | $\pi^d$ | $\theta^e$ | $D^f$      | $n^c$ | $S^a$ | $h^b$ | $\pi^d$ | $\theta^e$ | $D^f$ | $n^c$ | $S^a$ | $h^b$ | $\pi^d$ | $\theta^e$ | $D^f$ | $n^c$ | $S^a$ | $h^b$   | $\pi^d$ | $\theta^e$ | $D^f$ | $S^a$ | $h^b$ | $\pi^d$ | $\theta^e$ |       |
| 1       | <i>IGS03</i> | 2      | 764   | 5     | 6     | 6     | 2     | 3       | 0.061      | 0.087      | -0.85 | 8     | 0     | 1       | 0.000      | 0.000 | NA    | 8     | 0     | 1       | 0.000      | 0.000 | NA    | 8     | 1       | 2       | 0.043      | 0.039 | 0.16  | 0.7   | 1.8     | 0.024      | 0.031 |
| 2       | <i>IGS05</i> | 3      | 666   | 4     | 5     | 8     | 1     | 2       | 0.019      | 0.045      | -1.16 | 8     | 1     | 2       | 0.019      | 0.045 | -1.16 | 8     | 0     | 1       | 0.000      | 0.000 | NA    | 8     | 2       | 3       | 0.038      | 0.091 | -1.50 | 1.1   | 2.0     | 0.026      | 0.045 |
| 3       | <i>IGS09</i> | 4      | 760   | 7     | 7     | 8     | 4     | 3       | 0.224      | 0.159      | 1.28  | 8     | 3     | 2       | 0.181      | 0.119 | 1.51  | 8     | 3     | 2       | 0.158      | 0.119 | 0.95  | 8     | 3       | 3       | 0.209      | 0.119 | 2.20* | 3.3   | 3.0     | 0.181      | 0.139 |
| 4       | <i>IGS13</i> | 7      | 795   | 12    | 13    | 8     | 4     | 5       | 0.102      | 0.152      | -1.03 | 8     | 2     | 3       | 0.080      | 0.076 | 0.13  | 8     | 3     | 4       | 0.108      | 0.114 | -0.15 | 8     | 2       | 2       | 0.059      | 0.076 | -0.58 | 2.9   | 3.5     | 0.088      | 0.109 |
| 5       | <i>IGS15</i> | 8      | 707   | 5     | 6     | 5     | 1     | 2       | 0.028      | 0.050      | -1.11 | 5     | 1     | 2       | 0.028      | 0.050 | -1.11 | 5     | 1     | 2       | 0.050      | 0.050 | 0.01  | 4     | 0       | 1       | 0.000      | 0.000 | NA    | 1.1   | 2.0     | 0.035      | 0.048 |
| 6       | <i>IGS19</i> | 10     | 653   | 4     | 5     | 8     | 2     | 3       | 0.038      | 0.092      | -1.50 | 8     | 2     | 3       | 0.038      | 0.092 | -1.50 | 8     | 1     | 2       | 0.070      | 0.046 | 1.03  | 8     | 1       | 2       | 0.019      | 0.046 | -1.16 | 1.4   | 2.4     | 0.048      | 0.063 |
| 7       | <i>IGS21</i> | 11     | 753   | 2     | 3     | 8     | 1     | 2       | 0.061      | 0.040      | 1.03  | 8     | 1     | 2       | 0.053      | 0.040 | 0.65  | 8     | 1     | 2       | 0.070      | 0.040 | 1.47  | 8     | 1       | 2       | 0.043      | 0.040 | 0.16  | 0.9   | 1.8     | 0.038      | 0.030 |
| 8       | <i>IGS25</i> | 16     | 716   | 2     | 3     | 8     | 1     | 2       | 0.017      | 0.042      | -1.16 | 8     | 0     | 1       | 0.000      | 0.000 | NA    | 8     | 0     | 1       | 0.000      | 0.000 | NA    | 8     | 0       | 1       | 0.000      | 0.000 | NA    | 0.6   | 1.6     | 0.022      | 0.026 |
| 9       | <i>IGS27</i> | 20     | 715   | 12    | 9     | 8     | 8     | 4       | 0.357      | 0.337      | 0.21  | 8     | 4     | 2       | 0.256      | 0.169 | 1.63  | 8     | 7     | 5       | 0.339      | 0.295 | 0.53  | 8     | 5       | 3       | 0.274      | 0.211 | 0.99  | 6.1   | 3.9     | 0.307      | 0.264 |
| average |              | 725.4  | 5.9   | 6.3   |       | 2.7   | 2.9   | 0.101   | 0.112      | -          |       | 1.6   | 2.0   | 0.073   | 0.066      | -     |       | 1.8   | 2.2   | 0.088   | 0.074      | -     |       | 1.7   | 2.1     | 0.076   | 0.069      | -     | 2.0   | 2.4   | 0.085   | 0.084      |       |

<sup>a</sup>Number of polymorphic sites.

<sup>b</sup>Number of haplotypes.

<sup>c</sup>Number of individuals.

<sup>d</sup>Nucleotide diversity per site (%).

<sup>e</sup>Watterson's  $\theta$  per site (%).

<sup>f</sup>Tajima's  $D$ . Two-sided Tajima's  $D$  test was performed using coalescent simulations under 10,000 replicates, assuming no recombination and a Poisson distribution of mutations along lineages. \* indicates  $P < 0.05$ .
