# Supplementary material for: Rapid Expansion of Phenylthiocarbamide Non-Tasters among Japanese Macaques
Source: PubMed Central journal article supplement (PMC4511751; doi:10.1371/journal.pone.0132016), 2015-07-22
Supplement: pone.0132016.s007.pdf [file pone.0132016.s007.pdf]

**S4 Table. PCR and sequencing primers used in this study.**

| Locus                      |                    | Position in the Mac2 genome  | Forward Primer        |                               | Reverse Primer        |                              | Annealing Temperature |
|----------------------------|--------------------|------------------------------|-----------------------|-------------------------------|-----------------------|------------------------------|-----------------------|
|                            |                    |                              | Name                  | Sequence                      | Name                  | Sequence                     |                       |
| <i>TAS2R38</i>             | PCR                | chr3:179,407,166-179,408,167 | Mm-TAS2R38-F          | 5'-GCCAACTAGAGAAGAGAAGTAGA-3' | Mm-TAS2R38-R          | 5'-GACTCACAGGCGTATTAAGG-3'   | 56 °C                 |
|                            | Sequencing         |                              | Mm-TAS2R38_inner-F    | 5'-CAGCCTGCTCTACTGCTCCAA-3'   | Mm-TAS2R38_inner-R    | 5'-AGTCTGCCAAAAAAGCACCAAA-3' | -                     |
| <i>TAS2R38_5'-flanking</i> | PCR                | chr3:179,407,123-179,413,514 | TAS2R38_5'-flanking-F | 5'-TGTCTCGCTGTTCTAGGAAT-3'    | Mm-TAS2R38-R          | 5'-GACTCACAGGCGTATTAAGG-3'   | 60 °C                 |
|                            | Sequencing         |                              | chr3-179408908-F      | 5'-CTTCATGACCCAGTGCTAGT-3'    | chr3-179408140-R      | 5'-CAGTGCAGACGTGAGTTAGA-3'   | -                     |
|                            | Sequencing         |                              | chr3-179409668-F      | 5'-TTGGAGTCTCTGTGCCACT-3'     | chr3-179408769-R      | 5'-GTTCCCTTCCATGTGTGCTAGT-3' | -                     |
|                            | Sequencing         |                              | chr3-179410245-F      | 5'-GCAAGGGATACGATTCATAG-3'    | chr3-179409440-R      | 5'-GTTTCCCAATTCCTTACTC-3'    | -                     |
|                            | Sequencing         |                              | chr3-179410964-F      | 5'-TAGCCTGAATTTTCCAGAG-3'     | chr3-179410226-R      | 5'-CTATGAATCGTATCCCTTGC-3'   | -                     |
|                            | Sequencing         |                              | chr3-179411606-F      | 5'-GACTGGGTGAGGAATATCAA-3'    | chr3-179410873-R      | 5'-TGGCCTTCCAATATTTCTAA-3'   | -                     |
|                            | Sequencing         |                              | chr3-179412332-F      | 5'-TCTGACTCCCAGGTTTCATAC-3'   | chr3-179411582-R      | 5'-TGCTCTTGATATTCCTCACC-3'   | -                     |
|                            | Sequencing         |                              | chr3-179412873-F      | 5'-CTGTCAAGCTAACGAAGACC-3'    | chr3-179412183-R      | 5'-TTCAGTAATCGAGACCATCC-3'   | -                     |
| <i>TAS2R38_3'-flanking</i> | PCR                | chr3:179,402,038-179,408,214 | Mm-TAS2R38-F          | 5'-GCCAACTAGAGAAGAGAAGTAGA-3' | TAS2R38_5'-flanking-R | 5'-CAAGAAATCTGCCCTCATAG-3'   | 61 °C                 |
|                            | Sequencing         |                              | chr3-179407176-F      | 5'-CACTGTGCTGAGAATGGATA-3'    | chr3-179406340-R      | 5'-GAGAATGCCAAATCTCTACAA-3'  | -                     |
|                            | Sequencing         |                              | chr3-179406474-F      | 5'-GTGTGGACTTTCTGGCTATG-3'    | chr3-179405808-R      | 5'-GGGCATCTAGAAGAGTGGAT-3'   | -                     |
|                            | Sequencing         |                              | chr3-179405797-F      | 5'-GAGATGGAGCATCTTTTCAT-3'    | chr3-179405141-R      | 5'-ACAACCTAATGTAACAGTTGTG-   | -                     |
|                            | Sequencing         |                              | chr3-179404909-F      | 5'-TACAATGCTTGTGCTTTTG-3'     | chr3-179405010-R      | 5'-CAATGCATATATCAGACAAAGG-3' | -                     |
|                            | Sequencing         |                              | chr3-179404567-F      | 5'-TTTGGATTATGGTAGATTACTGG-3' | chr3-179404589-R      | 5'-TGGACAAATAGATCACTGGA-3'   | -                     |
|                            | Sequencing         |                              | chr3-179404018-F      | 5'-TCAGATGTAAAAAGCCCATT-3'    | chr3-179404189-R      | 5'-GGGCATATGTATGGAGAAAG-3'   | -                     |
|                            | Sequencing         |                              | chr3-179403523-F      | 5'-TTCATGAAGTTTGCTTTT-3'      | chr3-179403269-R      | 5'-TTGATGAATCACTGGCTAGA-3'   | -                     |
|                            | Sequencing         |                              | chr3-179403082-F      | 5'-CTTTACGTTTCTGCTCAAC-3'     | chr3-179402324-R      | 5'-TACAGCAATGCAAGAATGAC-3'   | -                     |
| <i>IGS03</i>               | PCR and Sequencing | chr2:5,175,371-5,176,134     | Mm-IGS03-F            | 5'-TGCTCTACCTGTGCGAATTG-3'    | Mm-IGS03-R            | 5'-ATGAATTGTTCAACCCCAAA-3'   | 60 °C                 |
| <i>IGS05</i>               |                    | chr3:14,376,060-14,376,727   | Mm-IGS05-F            | 5'-TGGCAGCCAGTCTTCTTT-3'      | Mm-IGS05-R            | 5'-CACCTAGGGCCACTGAAT-3'     | 60 °C                 |
| <i>IGS09</i>               |                    | chr4:141,712,948-141,713,707 | Mm-IGS09-F            | 5'-TCCTTCTCCAACAGACCAGA-3'    | Mm-IGS09-R            | 5'-CCACCAGGCTCCTCTCATT-3'    | 60 °C                 |
| <i>IGS13</i>               |                    | chr7:101,026,368-101,027,162 | Mm-IGS13-F            | 5'-CCGGTGCAGCTAATGTCTTT-3'    | Mm-IGS13-R            | 5'-TGGCCATGTAATGAGTTCCA-3'   | 60 °C                 |
| <i>IGS15</i>               |                    | chr8:98,384,350-98,385,056   | Mm-IGS15-F            | 5'-TGGTTTGACAGGTGACTGC-3'     | Mm-IGS15-R            | 5'-ATGGTGACTCACTGCTTGA-3'    | 60 °C                 |
| <i>IGS19</i>               |                    | chr10:71,411,234-71,411,886  | Mm-IGS19-F            | 5'-AGATGTGAGCCTGAGCCTGT-3'    | Mm-IGS19-R            | 5'-GCTGAAGCAGAACCAGAAC-3'    | 60 °C                 |
| <i>IGS21</i>               |                    | chr11:99,301,129-99,301,881  | Mm-IGS21-F            | 5'-GGGAAGTGCCTGATTGCAT-3'     | Mm-IGS21-R            | 5'-CCCCTTCATCTTCTCCTTC-3'    | 60 °C                 |
| <i>IGS25</i>               |                    | chr16:26,856,824-26,857,539  | Mm-IGS25-F            | 5'-GCCATAAAGCACACTGCTCA-3'    | Mm-IGS25-R            | 5'-CATTGAGCTTTTGCAGTGA-3'    | 60 °C                 |
| <i>IGS27</i>               |                    | chr20:17,422,254-17,422,968  | Mm-IGS27-F            | 5'-GGGGTAGAGGGAACATGGAT-3'    | Mm-IGS27-R            | 5'-GGGGTCTTTTGGGGTATGT-3'    | 60 °C                 |
